# Supplementary material
Source: Royal Society of Chemistry journal article supplement (doi:10.1039/d5nj04856g)
Supplement: d5nj04856g2.xlsx [file d5nj04856g2.xlsx]

## Sheet: PO4
formula	em	Ca	Sr	Ba	Mg	Zn	La	Y	Lu	Gd	Sc	Ga	Al	In	Bi	Li	Na	K	Rb
Sr3(PO4)2	414	0	21	0	0	0	0	0	0	0	0	0	0	0	0	0	0	0	0
Ca2.5Ba0.5(PO4)2	522	17.5	0	3.5	0	0	0	0	0	0	0	0	0	0	0	0	0	0	0
Ca2Ba(PO4)2	507	14	0	7	0	0	0	0	0	0	0	0	0	0	0	0	0	0	0
Ca1.5Ba1.5(PO4)2	461	10.5	0	10.5	0	0	0	0	0	0	0	0	0	0	0	0	0	0	0
CaBa2(PO4)2	458	7	0	14	0	0	0	0	0	0	0	0	0	0	0	0	0	0	0
Ca0.5Ba2.5(PO4)2	416	3.5	0	17.5	0	0	0	0	0	0	0	0	0	0	0	0	0	0	0
Ba3(PO4)2	413	0	0	21	0	0	0	0	0	0	0	0	0	0	0	0	0	0	0
Ca3(PO4)2	416	21	0	0	0	0	0	0	0	0	0	0	0	0	0	0	0	0	0
Ca2.7Sr0.3(PO4)2	493	18.9	2.1	0	0	0	0	0	0	0	0	0	0	0	0	0	0	0	0
Ca2.5Sr0.5(PO4)2	494	17.5	3.5	0	0	0	0	0	0	0	0	0	0	0	0	0	0	0	0
Ca2.25Sr0.75(PO4)2	500	15.4	5.25	0	0	0	0	0	0	0	0	0	0	0	0	0	0	0	0
Ca2Sr(PO4)2	508	14	7	0	0	0	0	0	0	0	0	0	0	0	0	0	0	0	0
Ca1.75Sr1.25(PO4)2	518	12.25	8.75	0	0	0	0	0	0	0	0	0	0	0	0	0	0	0	0
Ca1.5Sr1.5(PO4)2	520	10.5	10.5	0	0	0	0	0	0	0	0	0	0	0	0	0	0	0	0
Ca1.25Sr1.75(PO4)2	525	8.75	12.25	0	0	0	0	0	0	0	0	0	0	0	0	0	0	0	0
CaSr2(PO4)2	532	7	14	0	0	0	0	0	0	0	0	0	0	0	0	0	0	0	0
SrMg2(PO4)2	413	0	7	0	14	0	0	0	0	0	0	0	0	0	0	0	0	0	0
SrZn2(PO4)2	416	0	7	0	0	14	0	0	0	0	0	0	0	0	0	0	0	0	0
BaMg2(PO4)2	447	0	0	7	14	0	0	0	0	0	0	0	0	0	0	0	0	0	0
BaZn2(PO4)2	532	0	0	7	0	14	0	0	0	0	0	0	0	0	0	0	0	0	0
Ba2Mg(PO4)2	580	0	0	14	7	0	0	0	0	0	0	0	0	0	0	0	0	0	0
Ca9La(PO4)7	513.5	18	0	0	0	0	2	0	0	0	0	0	0	0	0	0	0	0	0
Ca8.75Sr0.25La(PO4)7	513.8	17.5	0.5	0	0	0	2	0	0	0	0	0	0	0	0	0	0	0	0
Ca8.5Sr0.5La(PO4)7	514.2	17	1	0	0	0	2	0	0	0	0	0	0	0	0	0	0	0	0
Ca8.25Sr0.75La(PO4)7	516	16.5	1.5	0	0	0	2	0	0	0	0	0	0	0	0	0	0	0	0
Ca8SrLa(PO4)7	520	16	2	0	0	0	2	0	0	0	0	0	0	0	0	0	0	0	0
Ca7.75Sr1.25La(PO4)7	523	15.5	2.5	0	0	0	2	0	0	0	0	0	0	0	0	0	0	0	0
Ca7.5Sr1.5La(PO4)7	524.3	15	3	0	0	0	2	0	0	0	0	0	0	0	0	0	0	0	0
Ca7.25Sr1.75La(PO4)7	525.7	14.5	3.5	0	0	0	2	0	0	0	0	0	0	0	0	0	0	0	0
Ca8.75Ba0.25La(PO4)7	514	17.5	0.5	0	0	0	2	0	0	0	0	0	0	0	0	0	0	0	0
Ca8.5Ba0.5La(PO4)7	516.5	17	1	0	0	0	2	0	0	0	0	0	0	0	0	0	0	0	0
Ca8.25Ba0.75La(PO4)7	517	16.5	1.5	0	0	0	2	0	0	0	0	0	0	0	0	0	0	0	0
Ca8BaLa(PO4)7	521	16	2	0	0	0	2	0	0	0	0	0	0	0	0	0	0	0	0
Ca7.75Ba1.25La(PO4)7	520	15.5	2.5	0	0	0	2	0	0	0	0	0	0	0	0	0	0	0	0
Ca7.5Ba1.5La(PO4)7	521.5	15	3	0	0	0	2	0	0	0	0	0	0	0	0	0	0	0	0
Ca7.25Ba1.75La(PO4)7	522.8	14.5	3.5	0	0	0	2	0	0	0	0	0	0	0	0	0	0	0	0
Ca9Y(PO4)7	486	18	0	0	0	0	0	2	0	0	0	0	0	0	0	0	0	0	0
Ca9Lu(PO4)7	480	18	0	0	0	0	0	0	2	0	0	0	0	0	0	0	0	0	0
Ca9Gd(PO4)7	490	18	0	0	0	0	0	0	0	2	0	0	0	0	0	0	0	0	0
Ca9Sc(PO4)7	416	18	0	0	0	0	0	0	0	0	2	0	0	0	0	0	0	0	0
Ca9Al(PO4)7	450	18	0	0	0	0	0	0	0	0	0	0	2	0	0	0	0	0	0
Sr9La(PO4)7	410	0	18	0	0	0	2	0	0	0	0	0	0	0	0	0	0	0	0
Sr9Y(PO4)7	523	0	18	0	0	0	0	2	0	0	0	0	0	0	0	0	0	0	0
Sr9Lu(PO4)7	516	0	18	0	0	0	0	0	2	0	0	0	0	0	0	0	0	0	0
Sr9Sc(PO4)7	510	0	18	0	0	0	0	0	0	0	2	0	0	0	0	0	0	0	0
Ca8MgGa(PO4)7	438	16	0	0	2	0	0	0	0	0	0	2	0	0	0	0	0	0	0
Ca8MgGa0.8La0.2(PO4)7	441	16	0	0	2	0	0.4	0	0	0	0	1.6	0	0	0	0	0	0	0
Ca8MgGa0.6La0.4(PO4)7	443	16	0	0	2	0	0.8	0	0	0	0	1.2	0	0	0	0	0	0	0
Ca8MgGa0.4La0.6(PO4)7	446	16	0	0	2	0	1.2	0	0	0	0	0.8	0	0	0	0	0	0	0
Ca8MgGa0.2La0.8(PO4)7	491	16	0	0	2	0	1.6	0	0	0	0	0.4	0	0	0	0	0	0	0
Ca8MgLa(PO4)7	510	16	0	0	2	0	2	0	0	0	0	0	0	0	0	0	0	0	0
Ca8MgLa0.8Y0.2(PO4)7	500	16	0	0	2	0	1.6	0.4	0	0	0	0	0	0	0	0	0	0	0
Ca8MgLa0.6Y0.4(PO4)7	496	16	0	0	2	0	1.2	0.8	0	0	0	0	0	0	0	0	0	0	0
Ca8MgLa0.4Y0.6(PO4)7	492	16	0	0	2	0	0.8	1.2	0	0	0	0	0	0	0	0	0	0	0
Ca8MgLa0.2Y0.8(PO4)7	489	16	0	0	2	0	0.4	1.6	0	0	0	0	0	0	0	0	0	0	0
Ca8MgY(PO4)7	484	16	0	0	2	0	0	2	0	0	0	0	0	0	0	0	0	0	0
Ca8MgLu(PO4)7	470	16	0	0	2	0	0	0	2	0	0	0	0	0	0	0	0	0	0
Ca7.5Sr0.5MgLu(PO4)7	475	15	1	0	2	0	0	0	2	0	0	0	0	0	0	0	0	0	0
Ca6.5Sr1.5MgLu(PO4)7	480	13	3	0	2	0	0	0	2	0	0	0	0	0	0	0	0	0	0
Ca6Sr2MgLu(PO4)7	488	12	4	0	2	0	0	0	2	0	0	0	0	0	0	0	0	0	0
Ca5Sr3MgLu(PO4)7	500	10	6	0	2	0	0	0	2	0	0	0	0	0	0	0	0	0	0
Ca3Sr5MgLu(PO4)7	512	6	10	0	2	0	0	0	2	0	0	0	0	0	0	0	0	0	0
CaSr7MgLu(PO4)7	517	2	14	0	2	0	0	0	2	0	0	0	0	0	0	0	0	0	0
Sr8MgLu(PO4)7	520	0	16	0	2	0	0	0	2	0	0	0	0	0	0	0	0	0	0
Ca8ZnY(PO4)7	487	16	0	0	0	2	0	2	0	0	0	0	0	0	0	0	0	0	0
Ca8ZnGd(PO4)7	487	16	0	0	0	2	0	0	0	2	0	0	0	0	0	0	0	0	0
Ca8ZnLa(PO4)7	505	16	0	0	0	2	2	0	0	0	0	0	0	0	0	0	0	0	0
Ca8ZnLu(PO4)7	480	16	0	0	0	2	0	0	2	0	0	0	0	0	0	0	0	0	0
Ca8ZnGa(PO4)7	420	16	0	0	0	2	0	0	0	0	0	2	0	0	0	0	0	0	0
Ca8ZnGa0.8La0.2(PO4)7	430	16	0	0	0	2	0.4	0	0	0	0	1.6	0	0	0	0	0	0	0
Ca8ZnGa0.6La0.4(PO4)7	468	16	0	0	0	2	0.8	0	0	0	0	1.2	0	0	0	0	0	0	0
Ca8ZnGa0.4La0.6(PO4)7	480	16	0	0	0	2	1.2	0	0	0	0	0.8	0	0	0	0	0	0	0
Ca8ZnGa0.2La0.8(PO4)7	493	16	0	0	0	2	0.6	0	0	0	0	0.4	0	0	0	0	0	0	0
Sr8MgLa(PO4)7	580	0	16	0	2	0	2	0	0	0	0	0	0	0	0	0	0	0	0
Sr8Mg0.9Zn0.1La(PO4)7	575	0	16	0	1.8	0.2	2	0	0	0	0	0	0	0	0	0	0	0	0
Sr8Mg0.8Zn0.2La(PO4)7	515	0	16	0	1.6	0.4	2	0	0	0	0	0	0	0	0	0	0	0	0
Sr8Mg0.7Zn0.3La(PO4)7	425	0	16	0	1.4	0.6	2	0	0	0	0	0	0	0	0	0	0	0	0
Sr8Mg0.5Zn0.5La(PO4)7	415	0	16	0	1	1	2	0	0	0	0	0	0	0	0	0	0	0	0
Sr8ZnLa(PO4)7	411	0	16	0	0	2	2	0	0	0	0	0	0	0	0	0	0	0	0
Sr8MgY(PO4)7	510	0	16	0	2	0	0	2	0	0	0	0	0	0	0	0	0	0	0
Sr8MgGd(PO4)7	513	0	16	0	2	0	0	0	0	2	0	0	0	0	0	0	0	0	0
Sr7CaMgGd(PO4)7	511	2	14	0	2	0	0	0	0	2	0	0	0	0	0	0	0	0	0
Sr6Ca2MgGd(PO4)7	509	4	12	0	2	0	0	0	0	2	0	0	0	0	0	0	0	0	0
Sr5Ca3MgGd(PO4)7	510	6	10	0	2	0	0	0	0	2	0	0	0	0	0	0	0	0	0
Sr4Ca4MgGd(PO4)7	509	8	8	0	2	0	0	0	0	2	0	0	0	0	0	0	0	0	0
Sr3Ca5MgGd(PO4)7	509	10	6	0	2	0	0	0	0	2	0	0	0	0	0	0	0	0	0
Sr2Ca6MgGd(PO4)7	498	12	4	0	2	0	0	0	0	2	0	0	0	0	0	0	0	0	0
SrCa7MgGd(PO4)7	480	14	2	0	2	0	0	0	0	2	0	0	0	0	0	0	0	0	0
Ca8MgGd(PO4)7	470	16	0	0	2	0	0	0	0	2	0	0	0	0	0	0	0	0	0
Sr8MgSc(PO4)7	507	0	16	0	2	0	0	0	0	0	2	0	0	0	0	0	0	0	0
Sr8MgGa(PO4)7	587	0	16	0	2	0	0	0	0	0	0	2	0	0	0	0	0	0	0
Sr8MgAl(PO4)7	590	0	16	0	2	0	0	0	0	0	0	0	2	0	0	0	0	0	0
Sr8ZnY(PO4)7	520	0	16	0	0	2	0	2	0	0	0	0	0	0	0	0	0	0	0
Sr8ZnLu(PO4)7	520	0	16	0	0	2	0	0	2	0	0	0	0	0	0	0	0	0	0
Sr8ZnSc(PO4)7	560	0	16	0	0	2	0	0	0	0	2	0	0	0	0	0	0	0	0
Ca9MgK(PO4)7	453	18	0	0	2	0	0	0	0	0	0	0	0	0	0	0	0	2	0
Ca9MgNa(PO4)7	454	18	0	0	2	0	0	0	0	0	0	0	0	0	0	0	2	0	0
Ca9MgLi(PO4)7	418	18	0	0	2	0	0	0	0	0	0	0	0	0	0	2	0	0	0
Ca9ZnNa(PO4)7	570	18	0	0	0	2	0	0	0	0	0	0	0	0	0	0	2	0	0
Ca9ZnLi(PO4)7	412	18	0	0	0	2	0	0	0	0	0	0	0	0	0	2	0	0	0
Sr9MgLi(PO4)7	580	0	18	0	2	0	0	0	0	0	0	0	0	0	0	2	0	0	0
Sr9MgK(PO4)7	610	0	18	0	2	0	0	0	0	0	0	0	0	0	0	0	0	2	0
Ca9Mg1.5(PO4)7	420	18	0	0	3	0	0	0	0	0	0	0	0	0	0	0	0	0	0
Sr9Mg1.5(PO4)7	620	0	18	0	3	0	0	0	0	0	0	0	0	0	0	0	0	0	0
Ca9Zn1.5(PO4)7	420	18	0	0	0	0	0	0	0	0	0	0	0	0	0	0	0	0	0
Ca10Li(PO4)7	414	20	0	0	0	0	0	0	0	0	0	0	0	0	0	2	0	0	0
Ca10Na(PO4)7	550	20	0	0	0	0	0	0	0	0	0	0	0	0	0	0	2	0	0
Ca10K(PO4)7	476	20	0	0	0	0	0	0	0	0	0	0	0	0	0	0	0	2	0
KCaLa(PO4)2	479	7	0	0	0	0	7	0	0	0	0	0	0	0	0	0	0	7	0
KCa0.95Sr0.05La(PO4)2	487	6.65	0.35	0	0	0	7	0	0	0	0	0	0	0	0	0	0	7	0
KCa0.9Sr0.1La(PO4)2	495	6.3	0.7	0	0	0	7	0	0	0	0	0	0	0	0	0	0	7	0
KCa0.85Sr0.15La(PO4)2	502	5.95	1.05	0	0	0	7	0	0	0	0	0	0	0	0	0	0	7	0
KCa0.8Sr0.2La(PO4)2	512	5.6	1.4	0	0	0	7	0	0	0	0	0	0	0	0	0	0	7	0
Ca5.6Sr2.4MgLa(PO4)7	547	11.2	4.8	0	2	0	2	0	0	0	0	0	0	0	0	0	0	0	0
Ca7.2Ba0.8MgLa(PO4)7	528	14.4	0	1.6	2	0	2	0	0	0	0	0	0	0	0	0	0	0	0
Ca4.8Sr2.4Ba0.8MgLa(PO4)7	535	9.6	4.8	1.6	2	0	2	0	0	0	0	0	0	0	0	0	0	0	0
Sr8ZnIn(PO4)7	412	0	16	0	0	2	0	0	0	0	0	0	0	2	0	0	0	0	0
Sr8MgIn(PO4)7	590	0	16	0	2	0	0	0	0	0	0	0	0	2	0	0	0	0	0
Sr9LiY0.667(PO4)7	520	0	18	0	0	0	0	1.334	0	0	0	0	0	0	0	2	0	0	0
Ca9KAl0.667(PO4)7	464	18	0	0	0	0	0	0	0	0	0	0	1.334	0	0	0	0	2	0
Ca9NaAl0.667(PO4)7	469	18	0	0	0	0	0	0	0	0	0	0	1.334	0	0	0	2	0	0
Ca9LiAl0.667(PO4)7	466	18	0	0	0	0	0	0	0	0	0	0	1.334	0	0	2	0	0	0
Na2Ca17Al2(PO4)7	462	17	0	0	0	0	0	0	0	0	0	0	2	0	0	0	2	0	0
Li2Ca17Al2(PO4)7	462	17	0	0	0	0	0	0	0	0	0	0	2	0	0	2	0	0	0
Ca9NaGd0.667(PO4)7	495	18	0	0	0	0	0	0	0	1.334	0	0	0	0	0	0	2	0	0
Ca8MgNaGd0.667(PO4)7	610	16	0	0	2	0	0	0	0	1.334	0	0	0	0	0	0	2	0	0
KCaY(PO4)2	475	7	0	0	0	0	0	7	0	0	0	0	0	0	0	0	0	7	0
Sr9MgLi(PO4)7	635	0	18	0	2	0	0	0	0	0	0	0	0	0	0	2	0	0	0
Sr9MgNa(PO4)7	635	0	18	0	2	0	0	0	0	0	0	0	0	0	0	0	2	0	0
Sr9MgK(PO4)7	635	0	18	0	2	0	0	0	0	0	0	0	0	0	0	0	0	2	0
Sr8MgIn(PO4)7	590	0	16	0	2	0	0	0	0	0	0	0	0	2	0	0	0	0	0
Ca19MgNa2(PO4)14	635	19	0	0	1	0	0	0	0	0	0	0	0	0	0	0	2	0	0
Sr19Mg2(PO4)14	620	0	19	0	2	0	0	0	0	0	0	0	0	0	0	0	0	0	0
Sr18Mg3(PO4)14	625	0	18	0	3	0	0	0	0	0	0	0	0	0	0	0	0	0	0
Sr8Mg2Na(PO4)7	620	0	16	0	4	0	0	0	0	0	0	0	0	0	0	0	2	0	0
Ca18K3Sc(PO4)14	472	18	0	0	0	0	0	0	0	0	1	0	0	0	0	0	0	3	0
Sr8CaLu(PO4)7	520	2	16	0	0	0	0	0	2	0	0	0	0	0	0	0	0	0	0
Ca9NaLu0.667(PO4)7	490	18	0	0	0	0	0	0	1.334	0	0	0	0	0	0	0	2	0	0
Sr8La0.5Na0.5Mg1.5(PO4)7	590	0	16	0	3	0	1	0	0	0	0	0	0	0	0	0	1	0	0
Sr7LaNaMg1.5(PO4)7	590	0	14	0	3	0	2	0	0	0	0	0	0	0	0	0	2	0	0
Ca18Na3Y(PO4)7	505	18	0	0	0	0	0	1	0	0	0	0	0	0	0	0	3	0	0
Sr8CaGa(PO4)7	537	2	16	0	0	0	0	0	0	0	0	2	0	0	0	0	0	0	0
Sr8CaAl(PO4)7	525	2	16	0	0	0	0	0	0	0	0	0	2	0	0	0	0	0	0
Ca9NaSc0.667(PO4)7	610	18	0	0	0	0	0	0	0	0	1.334	0	0	0	0	0	2	0	0
Ca9Na0.8Li0.2Sc0.667(PO4)7	615	18	0	0	0	0	0	0	0	0	1.334	0	0	0	0	0.4	1.6	0	0
Ca9Na0.6Li0.4Sc0.667(PO4)7	620	18	0	0	0	0	0	0	0	0	1.334	0	0	0	0	0.8	1.2	0	0
Ca9Na0.4Li0.6Sc0.667(PO4)7	625	18	0	0	0	0	0	0	0	0	1.334	0	0	0	0	1.2	0.8	0	0
Ca9Na0.2Li0.8Sc0.667(PO4)7	630	18	0	0	0	0	0	0	0	0	1.334	0	0	0	0	1.6	0.4	0	0
Ca9LiSc0.667(PO4)7	635	18	0	0	0	0	0	0	0	0	1.334	0	0	0	0	2	0	0	0
Ca9Bi(PO4)7	412	18	0	0	0	0	0	0	0	0	0	0	0	0	2	0	0	0	0
Ca7.2Sr1.8Bi(PO4)7	486	14.4	3.6	0	0	0	0	0	0	0	0	0	0	0	2	0	0	0	0
Ca5.4Sr3.6Bi(PO4)7	550	10.8	7.2	0	0	0	0	0	0	0	0	0	0	0	2	0	0	0	0
Ca4.5Sr4.5Bi(PO4)7	562	9	9	0	0	0	0	0	0	0	0	0	0	0	2	0	0	0	0
Ca3.6Sr5.4Bi(PO4)7	580	7.2	10.8	0	0	0	0	0	0	0	0	0	0	0	2	0	0	0	0
Ca1.8Sr7.2Bi(PO4)7	593	3.6	14.4	0	0	0	0	0	0	0	0	0	0	0	2	0	0	0	0
Sr9In(PO4)7	410	0	18	0	0	0	0	0	0	0	0	0	0	2	0	0	0	0	0
Sr9In0.9Lu0.1(PO4)7	410	0	18	0	0	0	0	0	0.2	0	0	0	0	1.8	0	0	0	0	0
Sr9In0.8Lu0.2(PO4)7	410	0	18	0	0	0	0	0	0.4	0	0	0	0	1.6	0	0	0	0	0
Sr9In0.7Lu0.3(PO4)7	410	0	18	0	0	0	0	0	0.6	0	0	0	0	1.4	0	0	0	0	0
Sr9In0.6Lu0.4(PO4)7	410	0	18	0	0	0	0	0	0.8	0	0	0	0	1.2	0	0	0	0	0
Sr9In0.5Lu0.5(PO4)7	520	0	18	0	0	0	0	0	1	0	0	0	0	1	0	0	0	0	0
Sr9In0.4Lu0.6(PO4)7	520	0	18	0	0	0	0	0	1.2	0	0	0	0	0.8	0	0	0	0	0
Sr9In0.3Lu0.7(PO4)7	520	0	18	0	0	0	0	0	1.4	0	0	0	0	0.6	0	0	0	0	0
Sr9In0.2Lu0.8(PO4)7	520	0	18	0	0	0	0	0	1.6	0	0	0	0	0.4	0	0	0	0	0
Sr9In0.1Lu0.9(PO4)7	520	0	18	0	0	0	0	0	1.8	0	0	0	0	0.2	0	0	0	0	0
Sr9Lu(PO4)7	520	0	18	0	0	0	0	0	2	0	0	0	0	0	0	0	0	0	0
Ca7Sr3.5(PO4)7	508	14	7	0	0	0	0	0	0	0	0	0	0	0	0	0	0	0	0
Ca7Sr3.4Na0.25(PO4)7	510	14	6.8	0	0	0	0	0	0	0	0	0	0	0	0	0	0.5	0	0
Ca7Sr3.25Na0.5(PO4)7	515	14	6.5	0	0	0	0	0	0	0	0	0	0	0	0	0	1	0	0
Ca7Sr3.125Na0.75(PO4)7	520	14	6.25	0	0	0	0	0	0	0	0	0	0	0	0	0	1.5	0	0
Ca7Sr3Na(PO4)7	530	14	6	0	0	0	0	0	0	0	0	0	0	0	0	0	2	0	0
Ca9La(PO4)7	501	18	0	0	0	0	2	0	0	0	0	0	0	0	0	0	0	0	0
Ca6.75Sr2.25La(PO4)7	514	13.5	4.5	0	0	0	2	0	0	0	0	0	0	0	0	0	0	0	0
Ca4.5Sr4.5La(PO4)7	519	9	9	0	0	0	2	0	0	0	0	0	0	0	0	0	0	0	0
Ca2.25Sr6.75La(PO4)7	525	4.4	13.5	0	0	0	2	0	0	0	0	0	0	0	0	0	0	0	0
Ca10K(PO4)7	470	20	0	0	0	0	0	0	0	0	0	0	0	0	0	0	0	2	0
Ca10.125K0.75(PO4)7	465	20.25	0	0	0	0	0	0	0	0	0	0	0	0	0	0	0	1.5	0
Ca10.25K0.5(PO4)7	420	20.5	0	0	0	0	0	0	0	0	0	0	0	0	0	0	0	1	0
Ca10.375K0.25(PO4)7	420	20.75	0	0	0	0	0	0	0	0	0	0	0	0	0	0	0	0.5	0
Ca10.5(PO4)7	420	21	0	0	0	0	0	0	0	0	0	0	0	0	0	0	0	0	0
Ca9Al(PO4)7	430	18	0	0	0	0	0	0	0	0	0	0	2	0	0	0	0	0	0
Ca9Al0.8Y0.2(PO4)7	443	18	0	0	0	0	0	0.4	0	0	0	0	1.6	0	0	0	0	0	0
Ca9Al0.6Y0.4(PO4)7	464	18	0	0	0	0	0	0.8	0	0	0	0	1.2	0	0	0	0	0	0
Ca9Al0.4Y0.6(PO4)7	474	18	0	0	0	0	0	1.2	0	0	0	0	0.8	0	0	0	0	0	0
Ca9Al0.2Y0.8(PO4)7	484	18	0	0	0	0	0	1.6	0	0	0	0	0.4	0	0	0	0	0	0
Ca9Y(PO4)7	490	18	0	0	0	0	0	2	0	0	0	0	0	0	0	0	0	0	0
Ca9MgK(PO4)7	467	18	0	0	2	0	0	0	0	0	0	0	0	0	0	0	0	2	0
Ca8SrMgK(PO4)7	470	16	2	0	2	0	0	0	0	0	0	0	0	0	0	0	0	2	0
Ca6Sr3MgK(PO4)7	490	12	6	0	2	0	0	0	0	0	0	0	0	0	0	0	0	2	0
Ca5Sr4MgK(PO4)7	516	10	10	0	2	0	0	0	0	0	0	0	0	0	0	0	0	2	0
Ca3Sr6MgK(PO4)7	526	6	12	0	2	0	0	0	0	0	0	0	0	0	0	0	0	2	0
CaSr8MgK(PO4)7	550	2	16	0	2	0	0	0	0	0	0	0	0	0	0	0	0	2	0
Sr9MgK(PO4)7	585	0	18	0	2	0	0	0	0	0	0	0	0	0	0	0	0	2	0
Sr8CaBi(PO4)7	606	16	0	0	0	0	0	0	0	0	0	0	0	0	2	0	0	0	0
RbCaGd(PO4)2	476	7	0	0	0	0	0	0	0	7	0	0	0	0	0	0	0	0	7
BaSrMg(PO4)2	585	0	7	7	7	0	0	0	0	0	0	0	0	0	0	0	0	0	0
MgZn2(PO4)7	525	0	0	0	7	14	0	0	0	0	0	0	0	0	0	0	0	0	0
Ca4.5Mg4.5Y(PO4)7	435	9	0	0	9	0	0	2	0	0	0	0	0	0	0	0	0	0	0
Ca6.3Mg2.7Y(PO4)7	442	12.6	0	0	5.4	0	0	2	0	0	0	0	0	0	0	0	0	0	0
Ca6.75Mg2.25Y(PO4)7	446	13.5	0	0	4.5	0	0	2	0	0	0	0	0	0	0	0	0	0	0
Ca7.2Mg1.8Y(PO4)7	454	14.4	0	0	3.6	0	0	2	0	0	0	0	0	0	0	0	0	0	0
Ca7.65Mg1.35Y(PO4)7	458	15.3	0	0	2.7	0	0	2	0	0	0	0	0	0	0	0	0	0	0
Ca8.1Mg0.9Y(PO4)7	465	16.2	0	0	1.8	0	0	2	0	0	0	0	0	0	0	0	0	0	0
Ca8.55Mg0.45Y(PO4)7	472	17.1	0	0	0.9	0	0	2	0	0	0	0	0	0	0	0	0	0	0
Ca9Y(PO4)7	486	18	0	0	0	0	0	2	0	0	0	0	0	0	0	0	0	0	0
Ca8.55Sr0.45Y(PO4)7	487	17.1	0.9	0	0	0	0	2	0	0	0	0	0	0	0	0	0	0	0
Ca8.1Sr0.9Y(PO4)7	489	16.2	1.8	0	0	0	0	2	0	0	0	0	0	0	0	0	0	0	0
Ca7.65Sr1.35Y(PO4)7	492	15.3	2.7	0	0	0	0	2	0	0	0	0	0	0	0	0	0	0	0
Ca7.2Sr1.8Y(PO4)7	494	14.4	3.6	0	0	0	0	2	0	0	0	0	0	0	0	0	0	0	0
Ca6.75Sr2.25Y(PO4)7	496	13.5	4.5	0	0	0	0	2	0	0	0	0	0	0	0	0	0	0	0
Ca6.3Sr2.7Y(PO4)7	502	12.6	5.4	0	0	0	0	2	0	0	0	0	0	0	0	0	0	0	0
Ca4.5Sr4.5Y(PO4)7	508	9	9	0	0	0	0	2	0	0	0	0	0	0	0	0	0	0	0
Ca19Zn2(PO4)14	415	19	0	0	0	2	0	0	0	0	0	0	0	0	0	0	0	0	0
this-Ca8MgLa(PO4)7	490	16	0	0	2	0	2	0	0	0	0	0	0	0	0	0	0	0	0
this-Ca7SrMgLa(PO4)7	498	14	2	0	2	0	2	0	0	0	0	0	0	0	0	0	0	0	0
this-Ca6Sr2MgLa(PO4)7	507	12	4	0	2	0	2	0	0	0	0	0	0	0	0	0	0	0	0
this-Ca5Sr3MgLa(PO4)7	513	10	6	0	2	0	2	0	0	0	0	0	0	0	0	0	0	0	0
this-Ca4Sr4MgLa(PO4)7	522	8	8	0	2	0	2	0	0	0	0	0	0	0	0	0	0	0	0
this-Ca3Sr5MgLa(PO4)7	529	6	10	0	2	0	2	0	0	0	0	0	0	0	0	0	0	0	0
this-Ca2Sr6MgLa(PO4)7	541	4	12	0	2	0	2	0	0	0	0	0	0	0	0	0	0	0	0
this-CaSr7MgLa(PO4)7	563	2	14	0	2	0	2	0	0	0	0	0	0	0	0	0	0	0	0
this-Sr8MgLa(PO4)7	586	0	16	0	2	0	2	0	0	0	0	0	0	0	0	0	0	0	0
